# Supplementary material
Source: MDPI journal article supplement (https://www.mdpi.com/2079-6447/1/3/18)
Supplement: s1 [file s1]

Supplementary information for

# Photonics of Halogenated Zinc(II) and Cadmium(II) Dipyrrromethene Complexes

Iuliia Aksenova <sup>1,\*</sup>, Elena Bocharnikova <sup>1</sup>, Maria Ashmarina <sup>1</sup>

<sup>1</sup> Laboratory of Photophysics and Photochemistry of Molecules, Department of Physics, National Research Tomsk State University; 634050 Tomsk, Russia; bocharnikova.2010@mail.ru (E.B.); mariaashmarina6@gmail.com (M.A.)

\* Correspondence: akseanova.iuliia@gmail.com; Tel.: +7-906-951-06-28

## Table of Contents

|                                                                                                      |    |
|------------------------------------------------------------------------------------------------------|----|
| 1. Structural formulas, absorption and luminescence spectra of zinc(II) dipyrrromethene complexes    | S2 |
| 2. Structural formulas, absorption and luminescence spectra of cadmium(II) dipyrrromethene complexes | S5 |

**Table S1.** Structural formulas, absorption and luminescence spectra of zinc(II) dipyrromethene complexes.

| Zn[Br <sub>2</sub> (CH <sub>3</sub> ) <sub>2</sub> (C <sub>5</sub> H <sub>11</sub> ) <sub>2</sub> dpm] <sub>2</sub> |                                                                                                                                                                      |
|---------------------------------------------------------------------------------------------------------------------|----------------------------------------------------------------------------------------------------------------------------------------------------------------------|
| 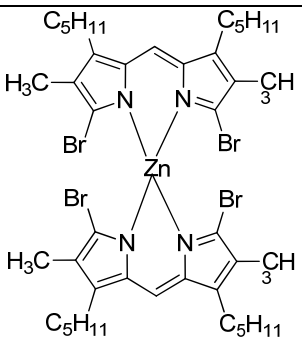                                   | <p>complexes of zinc(II) with</p> <p>3,3'-dipenthyl-4,4'-dimethyl-<br/>5,5'-dibromo-2,2'-dipyrromethene</p>                                                          |
|                                   |                                                                                   |
| Absorption spectra in propanol-2 solution                                                                           | Fluorescence spectra in propanol-2 solution<br>at λ <sub>ex</sub> = 480 nm, 298K                                                                                     |
|                                  |                                                                                  |
| Phosphorescence spectra in propanol-2 solution<br>at λ <sub>ex</sub> = 470 nm, 77K                                  | Dependence of the logarithm of phosphorescence<br>attenuation on the lifetime (λ <sub>ex</sub> = 470 nm, λ <sub>em</sub> = 740<br>nm) in propanol-2 solutions at 77K |

| Zn[Br <sub>2</sub> (CH <sub>3</sub> ) <sub>4</sub> dpm] <sub>2</sub>                      |                                                                                                                                                                             |
|-------------------------------------------------------------------------------------------|-----------------------------------------------------------------------------------------------------------------------------------------------------------------------------|
|                                                                                           | <p>complexes of zinc(II) with<br/>3,3',5,5'-tetramethyl-4,4'-dibromo-<br/>2,2'-dipyromethene</p>                                                                            |
|                                                                                           |                                                                                                                                                                             |
| <p>Absorption spectra in propanol-2 solution</p>                                          | <p>Fluorescence spectra in propanol-2 solution<br/>at λ<sub>ex</sub> = 470 nm, 298K</p>                                                                                     |
|                                                                                           |                                                                                                                                                                             |
| <p>Phosphorescence spectra in propanol-2 solution<br/>at λ<sub>ex</sub> = 470 nm, 77K</p> | <p>Dependence of the logarithm of phosphorescence<br/>attenuation on the lifetime (λ<sub>ex</sub> = 470 nm, λ<sub>em</sub> = 740<br/>nm) in propanol-2 solutions at 77K</p> |

| Zn[I(CH <sub>3</sub> ) <sub>4</sub> (C <sub>2</sub> H <sub>5</sub> )dpm] <sub>2</sub>             |                                                                                                                                                                                            |
|---------------------------------------------------------------------------------------------------|--------------------------------------------------------------------------------------------------------------------------------------------------------------------------------------------|
| 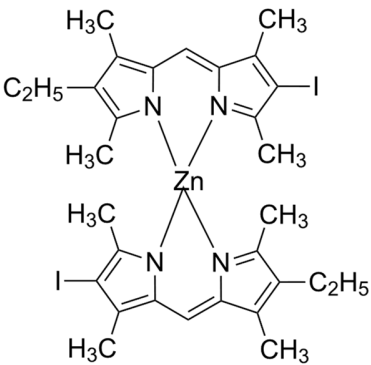                 | <p>complexes of zinc(II) with<br/>3,3',5,5'-tetramethyl-4-ethyl-<br/>4'-iodo-2,2'-dipyrrromethene</p>                                                                                      |
|                                                                                                   |                                                                                                                                                                                            |
| Absorption spectra in propanol-2 solution                                                         | Fluorescence spectra in propanol-2 solution<br>at $\lambda_{\text{ex}} = 470 \text{ nm}$ , 298K                                                                                            |
|                                                                                                   |                                                                                                                                                                                            |
| Phosphorescence spectra in propanol-2 solution<br>at $\lambda_{\text{ex}} = 470 \text{ nm}$ , 77K | Dependence of the logarithm of phosphorescence<br>attenuation on the lifetime ( $\lambda_{\text{ex}} = 470 \text{ nm}$ , $\lambda_{\text{em}} = 740$<br>nm) in propanol-2 solutions at 77K |

**Table S2.** Structural formulas, absorption and luminescence spectra of cadmium(II) dipyrromethene complexes.

| Cd[Br <sub>2</sub> (CH <sub>3</sub> ) <sub>2</sub> (C <sub>5</sub> H <sub>11</sub> ) <sub>2</sub> dpm] <sub>2</sub> |                                                                                                                                                                     |
|---------------------------------------------------------------------------------------------------------------------|---------------------------------------------------------------------------------------------------------------------------------------------------------------------|
| 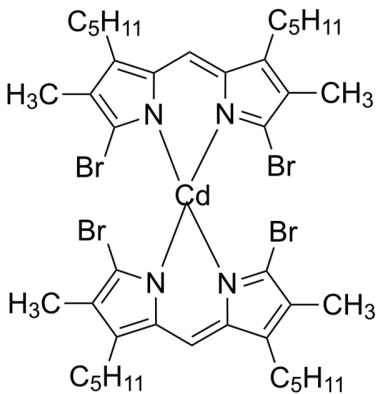                                   | <p>complexes of cadmium (II) with<br/>3,3'-dipenthyl-4,4'-dimethyl-<br/>5,5'-dibromo-2,2'-dipyrromethene</p>                                                        |
|                                                                                                                     |                                                                                                                                                                     |
| Absorption spectra in propanol-2 solution                                                                           | Fluorescence spectra in propanol-2 solution<br>at $\lambda_{ex} = 470$ nm, 298K                                                                                     |
|                                                                                                                     |                                                                                                                                                                     |
| Phosphorescence spectra in propanol-2 solution<br>at $\lambda_{ex} = 470$ nm, 77K                                   | Dependence of the logarithm of phosphorescence<br>attenuation on the lifetime ( $\lambda_{ex} = 470$ nm, $\lambda_{em} = 740$<br>nm) in propanol-2 solutions at 77K |

| Cd[Br <sub>2</sub> (CH <sub>3</sub> ) <sub>4</sub> dpm] <sub>2</sub>                              |                                                                                                                                                                                            |
|---------------------------------------------------------------------------------------------------|--------------------------------------------------------------------------------------------------------------------------------------------------------------------------------------------|
| 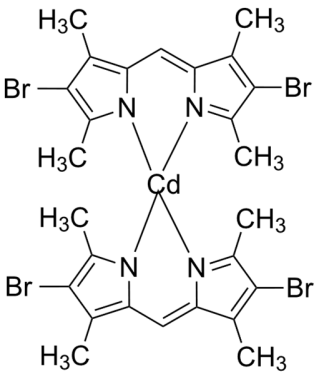                 | <p>complexes of cadmium (II) with<br/>3,3',5,5'-tetramethyl-4,4'-dibromo-<br/>2,2'-dipyrrromethene</p>                                                                                     |
|                                                                                                   |                                                                                                                                                                                            |
| Absorption spectra in propanol-2 solution                                                         | Fluorescence spectra in propanol-2 solution<br>at $\lambda_{\text{ex}} = 470 \text{ nm}$ , 298K                                                                                            |
|                                                                                                   |                                                                                                                                                                                            |
| Phosphorescence spectra in propanol-2 solution<br>at $\lambda_{\text{ex}} = 470 \text{ nm}$ , 77K | Dependence of the logarithm of phosphorescence<br>attenuation on the lifetime ( $\lambda_{\text{ex}} = 470 \text{ nm}$ , $\lambda_{\text{em}} = 740$<br>nm) in propanol-2 solutions at 77K |

| Cd[I(CH <sub>3</sub> ) <sub>4</sub> (C <sub>2</sub> H <sub>5</sub> )dpm] <sub>2</sub>             |                                                                                                                                                                                            |
|---------------------------------------------------------------------------------------------------|--------------------------------------------------------------------------------------------------------------------------------------------------------------------------------------------|
| 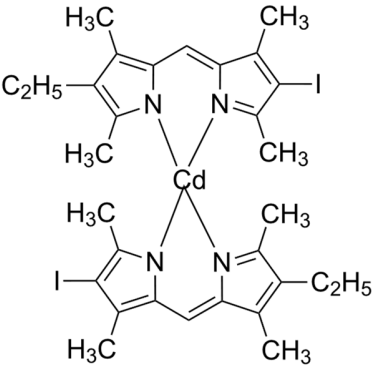                 | <p>complexes of cadmium (II) with<br/>3,3',5,5'-tetramethyl-4-ethyl-<br/>4'-iodo-2,2'-dipyrromethene</p>                                                                                   |
|                                                                                                   |                                                                                                                                                                                            |
| Absorption spectra in propanol-2 solution                                                         | Fluorescence spectra in propanol-2 solution<br>at $\lambda_{\text{ex}} = 470 \text{ nm}$ , 298K                                                                                            |
|                                                                                                   |                                                                                                                                                                                            |
| Phosphorescence spectra in propanol-2 solution<br>at $\lambda_{\text{ex}} = 470 \text{ nm}$ , 77K | Dependence of the logarithm of phosphorescence<br>attenuation on the lifetime ( $\lambda_{\text{ex}} = 470 \text{ nm}$ , $\lambda_{\text{em}} = 740$<br>nm) in propanol-2 solutions at 77K |
